# Supplementary material for: Carbon fluxes in spring wheat agroecosystem in India
Source: Copernicus journal article supplement (doi:10.5194/esd-14-915-2023), 2023-09-08
Supplement: Supplementary file 1 [file esd-14-915-2023-supplement.pdf]

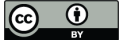

*Supplement of*

## **Carbon fluxes in spring wheat agroecosystem in India**

**Kangari Narender Reddy et al.**

*Correspondence to:* Kangari Narender Reddy (knreddyitd@gmail.com)

The copyright of individual parts of the supplement might differ from the article licence.

## Evaluation of ISAM against observations

The sowing date simulated by ISAM is compared against the GGCM (Global Gridded Crop Model Intercomparison) Phase 3 dataset [Jägermeyr et al., 2021] produced as part of the AGMIP (The Agricultural Intercomparison and Improvement Project). The GGCM dataset provides a single sowing date, while ISAM simulates the sowing date every growing season. Therefore, we compared the mean sowing date simulated by ISAM for each grid cell from 1980 to 2016 against the sowing date of GGCM data (Figure S1). We can observe that most parts of the wheat-growing regions have similar sowing dates in both cases except for the northwestern regions. Upon comparing the LAI and growing season simulated by ISAM against the observations, we found that the sowing dates simulated by ISAM are in good agreement with the observations, and perhaps GGCM data might have a bias in this region.

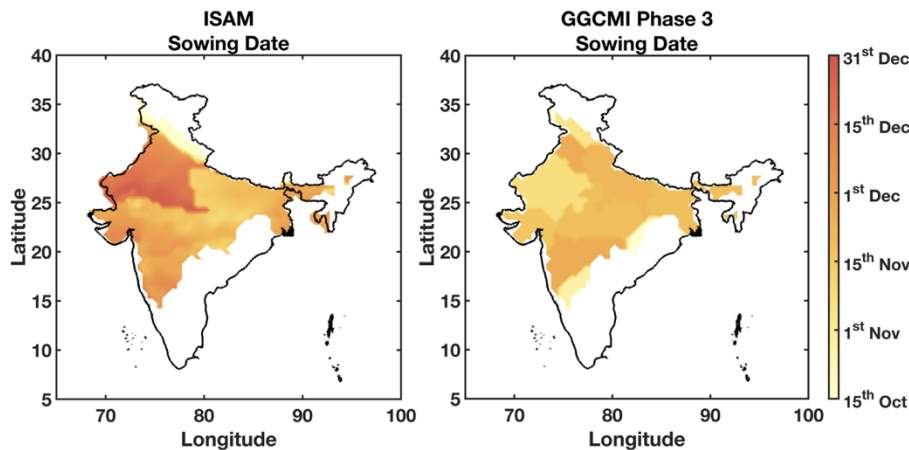

Figure S1: Comparison of sowing date simulated by ISAM against the GGCM Phase 3 dataset.

The comparison of LAI (Figure S2) shows that the growing season and crop growth are captured reasonably well in most cases. While analyzing the accuracy of the model LAI, we must remember that the grid scale data is compared against the site scale observations. The Fig. S2 also shows the locations of all the spring wheat sites used for ISAM model validation.

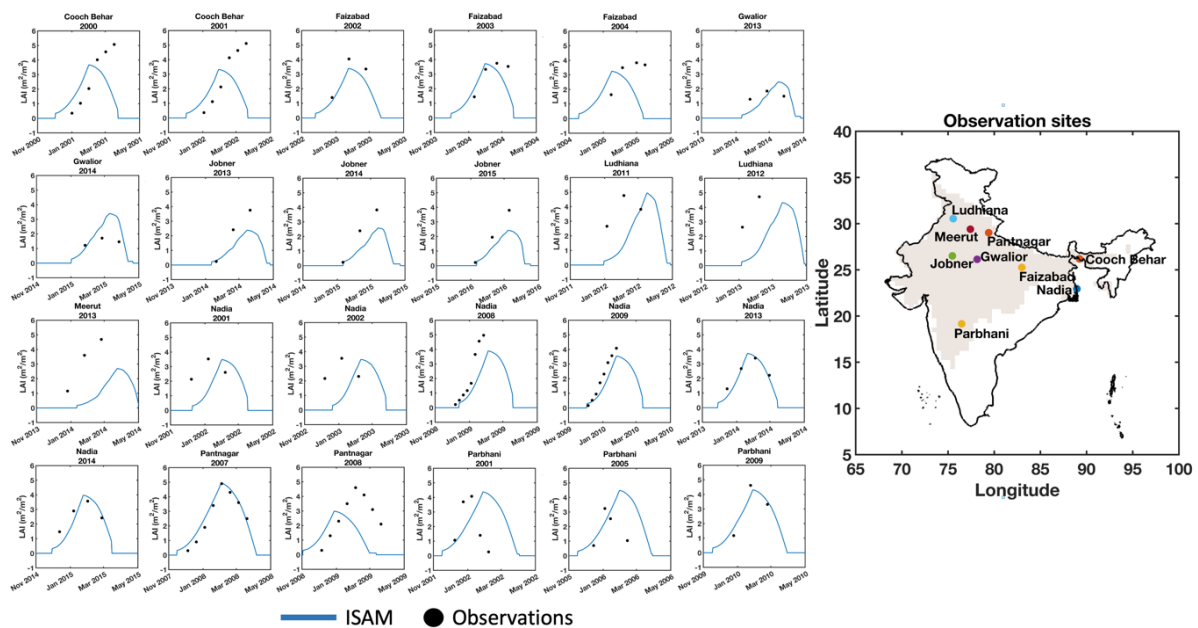

Figure S2: Comparison of site scale LAI observations against ISAM  $S_{CON}$  simulations. The map shows the location of the site scale observations.

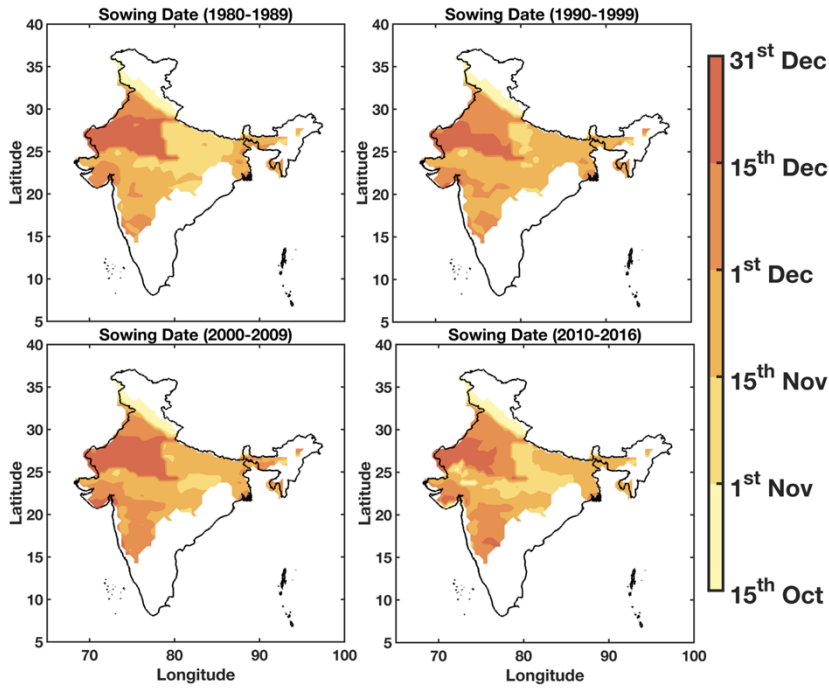

Figure S3: The decadal mean of sowing dates simulated by ISAM.

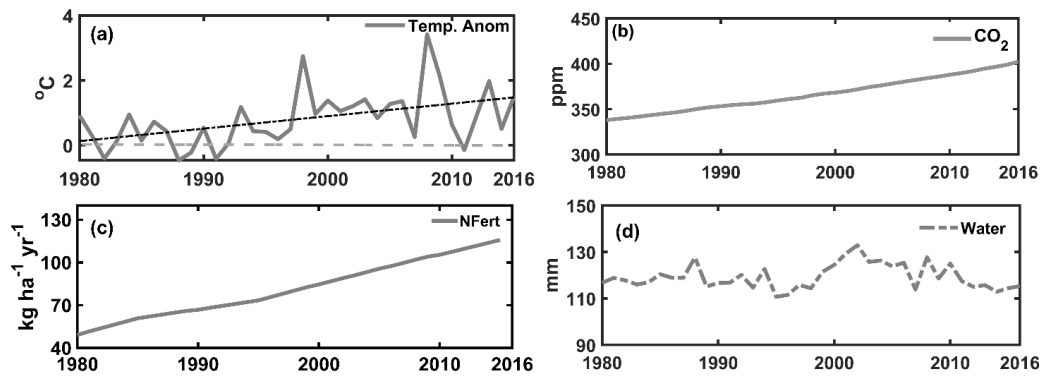

Figure S4: Time series of climate variables (a) Temperature anomaly, (b) Carbon Dioxide and management practice, (c) Nitrogen fertilization, and (d) Anomaly in water available in the root zone ( $S_{CON} - S_{Water}$ ) during the growing season.

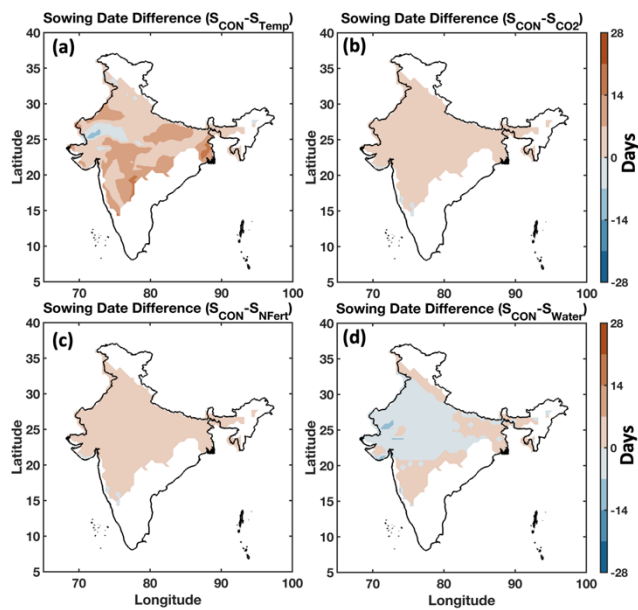

Figure S5: The difference in sowing date caused due to the effect of climatic variables: (a) temperature and (b) [CO<sub>2</sub>], and management practices: (c) Nitrogen fertilization and (d) water available.

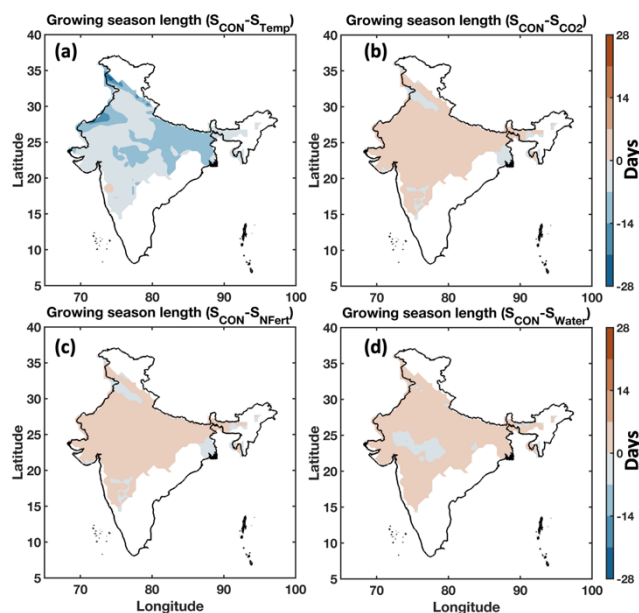

**Figure S6:** The difference in growing season length caused due to the effect of climatic variables: (a) temperature and (b) [CO<sub>2</sub>], and management practices: (c) Nitrogen fertilization and (d) water available.

*Table S1: The site details, growing season, and the yield used for the ISAM simulations' validation.*

| S No | Site Name   | Latitude | Longitude | Sowing Year | Yield (kg/ha) | Growing Season Length (days) |
|------|-------------|----------|-----------|-------------|---------------|------------------------------|
| 1    | Cooch Behar | 26.19    | 89.23     | 2000        | 3753.67       | 120                          |
| 2    | Cooch Behar | 26.19    | 89.23     | 2001        | 3882.7        | 121                          |
| 3    | Faizabad    | 25.26    | 82.99     | 2002        | 4182.33       | 142                          |
| 4    | Faizabad    | 25.26    | 82.99     | 2003        | 5082          | 129                          |
| 5    | Faizabad    | 25.26    | 82.99     | 2004        | 5152          | 121                          |
| 6    | Gwalior     | 26.14    | 78.15     | 2013        | 4309.875      | 113                          |
| 7    | Jobner      | 26.51    | 75.28     | 2002        | 4140          | 129                          |
| 8    | Jobner      | 26.51    | 75.47     | 2013        | 3676.75       | 127                          |
| 9    | Jobner      | 26.51    | 75.47     | 2014        | 3520.25       | 131                          |
| 10   | Jobner      | 26.51    | 75.47     | 2015        | 3896          | 135                          |
| 11   | Ludhiana    | 30.54    | 75.56     | 2011        | 4571.67       | 170                          |
| 12   | Ludhiana    | 30.54    | 75.56     | 2012        | 4579.33       | 169                          |
| 13   | Meerut      | 29.4     | 77.42     | 2011        | 3742.495      | 138                          |
| 14   | Meerut      | 29.4     | 77.42     | 2012        | 4072.33       | 142                          |
| 15   | Meerut      | 29.4     | 77.42     | 2013        | 4206          | 142                          |
| 16   | Nadia       | 22.95    | 88.95     | 2001        | 3420          | 92                           |
| 17   | Nadia       | 22.95    | 88.95     | 2002        | 3433          | 124                          |
| 18   | Nadia       | 22.95    | 88.95     | 2008        | 3175          | 134                          |
| 19   | Nadia       | 22.95    | 88.95     | 2009        | 3356          | 137                          |
| 20   | Nadia       | 22.95    | 88.95     | 2013        | 3782          | 126                          |
| 21   | Pantnagar   | 29.02    | 79.4      | 2007        | 3982.33       | 126                          |
| 22   | Pantnagar   | 29.02    | 79.4      | 2008        | 3603.67       | 126                          |
| 23   | Parbhani    | 19.16    | 76.47     | 2001        | 2907.22       | 109                          |
| 24   | Parbhani    | 19.16    | 76.47     | 2005        | 4450          | 120                          |
| 25   | Parbhani    | 19.16    | 76.47     | 2009        | 2761          | 106                          |

Note: A comprehensive crop dataset for the modeling community to calibrate and validate crop models over the Indian region is created as part of the current study. Here we show the yield and growing season length data of 9 spring wheat sites across 25 growing seasons.

Table S2: Comparison of the carbon flux ratios in various studies

| S No | NPP/GPP | Ra/GPP   | TER/GPP | Reference                   |
|------|---------|----------|---------|-----------------------------|
| 1    | 0.7385  | 0.2615   | 0.5006  | This study*                 |
| 2    |         | ~0.3-0.6 |         | Amthor and Baldocchi (2001) |
| 2    | 0.76    | 0.24     | 0.59    | Zhang et al. (2020)         |
| 3    | 0.56    | 0.44     | 0.60    | Aubinet et al. (2009)       |
| 4    | 0.52    | 0.48     | 0.57    | Aubinet et al. (2009)       |
| 5    | 0.51    | 0.49     | 0.71    | Demyan et al. (2016)        |
| 6    | 0.54    | 0.46     | 0.61    | Moureaux et al. (2008)      |
| 7    | 0.55    | 0.45     | 0.57    | Suleau et al. (2011)        |
| 8    | 0.57    | 0.43     | 0.66    | Wang et al. (2015)          |

## References:

Amthor, J. S., and Baldocchi, D. D.: Terrestrial Higher Plant Respiration and Net Primary Production, *Terr. Glob. Product.*, 33–59, <https://doi.org/10.1016/B978-012505290-0/50004-1>, 2001.

Aubinet, M., Moureaux, C., Bodson, B., Dufranne, D., Heinesch, B., Suleau, M., Vancutsem, F., and Vilret, A.: Carbon sequestration by a crop over a 4-year sugar beet/winter wheat/seedpotato/winter wheat rotation cycle, *Agr. Forest Meteorol.*, 149, 407–418, <https://doi.org/10.1016/j.agrformet.2008.09.003>, 2009.

Demyan, M. S., Ingwersen, J., Funkuin, Y. N., Ali, R. S., Mirzaeitalarposhti, R., Rasche, F., Poll, C., Muller, T., Streck, T., Kandeler, E., and Cadisch, G.: Partitioning of ecosystem respiration in winter wheat and silage maize modeling seasonal temperature effects, *Agr. Ecosyst. Environ.*, 224, 131–144, <https://doi.org/10.1016/j.agee.2016.03.039>, 2016.

Gahlot, S., Lin, T.-S., Jain, A. K., Baidya Roy, S., Sehgal, V. K., and Dhakar, R.: Impact of environmental changes and land management practices on wheat production in India, *Earth Syst. Dynam.*, 11, 641–652, <https://doi.org/10.5194/esd-11-641-2020>, 2020.

Jägermeyr, J., Müller, C., Ruane, A. C., Elliott, J., Balkovic, J., Castillo, O., Faye, B., Foster, I., Folberth, C., Franke, J. A., Fuchs, K., Guarin, J. R., Heinke, J., Hoogenboom, G., Iizumi, T., Jain, A. K., Kelly, D., Khabarov, N., Lange, S., Lin, T., Liu, W., Mialyk, O., Minoli, S., Moyer, E., Okada, M., Phillips, M., Porter, C., Rabin, S. S., Scheer, C., Schneider, J. M., Schyns, J. F., Skalsky, R., Smerald, A., Stella, T., Stephens, H., Webber, H., Zabel, F., and Rosenzweig, S.: Climate impacts on global agriculture emerge earlier in new generation of climate and crop models. *Nat. Food* 2, 873–885, <https://doi.org/10.1038/s43016-021-00400-y>, 2021.

Moureaux, C., Debacq, A., Hoyaux, J., Suleau, M., Tourneur, D., Vancutsem, F., Bodson, B., and Aubinet, M.: Carbon balance assessment of a Belgian winter wheat crop (*Triticum aestivum* L.), *Glob. Change Biol.*, 14, 1353–1366, <https://doi.org/10.1111/j.1365-2486.2008.01560.x>, 2008.

Suleau, M., Moureaux, C., Dufranne, D., Buysse, P., Bodson, B., Destain, J. P., Heinesch, B., Debacq, A., and Aubinet, M.: Respiration of three Belgian crops: Partitioning of total ecosystem respiration in its heterotrophic, above- and below-ground autotrophic components, *Agr. Forest Meteorol.*, 151, 633–643, <https://doi.org/10.1016/j.agrformet.2011.01.012>, 2011.

Wang, Y. Y., Hu, C. S., Dong, W. X., Li, X. X., Zhang, Y. M., Qin, S. P., and Oenema, O.: Carbon budget of a winter-wheat and summer-maize rotation cropland in the North China Plain, *Agr. Ecosyst. Environ.*, 206, 33–45, <https://doi.org/10.1016/j.agee.2015.03.016>, 2015.

Zhang, Q., Lei, H., Yang, D., Xiong, L., Liu, P., and Fang, B.: Decadal variation in CO<sub>2</sub> fluxes and its budget in a wheat and maize rotation cropland over the North China Plain. *Biogeosciences*, 17(8), 2245–2262. <https://doi.org/10.5194/bg-17-2245-2020>, 2020.
